# Supplementary material for: The detection dogs test is more sensitive than real-time PCR in screening for SARS-CoV-2
Source: PubMed Central journal article supplement (PMC8175360; doi:10.1038/s42003-021-02232-9), 2021-06-03
Supplement: 42003_2021_2232_MOESM3_ESM.pdf [file 42003_2021_2232_MOESM3_ESM.pdf]

## **Description of Additional Supplementary Files**

### **File name: Supplementary Data 1**

**Description:** Provides raw data for the graph presented in Figure 2 in main manuscript.

### **File name: Supplementary Data 2**

**Description:** Provides the R script encoding the Bayesian latent class model, which was fitted in OpenBUGS v3.2.2 to run the Bayesian analysis.
